# Supplementary material for: Associations of individual and joint expressions of ERCC6 and ERCC8 with clinicopathological parameters and prognosis of gastric cancer
Source: PeerJ. 2021 Jul 15;9:e11791. doi: 10.7717/peerj.11791 (PMC8286707; doi:10.7717/peerj.11791)
Supplement: Supplemental Information 2 [file peerj-09-11791-s002.xlsx]

## Sheet: table S2
Table S2. Association of ERCC6/ERCC8 expression with clinicopathological features in gastric cancer
Variability	ERCC6 expression		PR(%)	P		ERCC8 expression		PR(%)	P		ERCC6-8* expression		PR(%)	P		ERCC6-8** expression		PR(%)	P
	negative	positive				negative	positive				negative	positive				negative	positive
Age (years)
≤60	32	19	37.3	0.379		31	20	39.2	0.891		41	10	19.6	0.379		22	29	56.9	0.721
>60	41	17	29.3			36	22	37.9			50	8	13.8			27	31	53.4
Gender
Male	45	28	38.4	0.092		43	30	41.1	0.434		59	14	19.2	0.286		29	44	60.3	0.118
Female	28	8	22.2			24	12	33.3			32	4	11.1			20	16	44.4
Smoking
Yes	22	14	38.9	0.352		19	17	47.2	0.151		28	8	22.2	0.17		13	23	63.9	0.201
No	47	20	29.9			45	22	32.8			59	8	11.9			33	34	50.7
Alcohol
Yes	12	6	33.3	0.974		9	9	50	0.243		16	2	11.1	0.569		5	13	72.2	0.113
No	57	28	32.9			55	30	35.3			71	14	16.5			41	44	51.8
Family history
Yes	54	25	31.6	0.777		14	9	39.1	0.833		20	3	13	0.798		9	14	60.9	0.513
No	15	8	34.8			50	29	36.7			67	12	15.2			37	42	53.2
Tumor size
≤3	8	6	42.9	0.35		7	7	50	0.007		10	4	28.6	0.005		5	9	64.3	0.135
3-5	20	13	39.4			14	19	57.6			23	10	30.3			11	22	66.7
>5	45	17	27.4			46	16	25.8			58	4	6.5			33	29	46.8
Phase of progression
EGC	10	8	44.4	0.26		7	11	61.1	0.031		13	5	27.8	0.159		4	14	77.8	0.034
AGC	63	28	30.8			60	31	34.1			78	13	14.3			45	46	50
Borrmann classification
Borrmann I–II	12	12	50	0.017		12	12	50	0.055		15	9	37.5	<0.001		9	15	62.5	0.172
Borrmann III–IV	51	16	23.9			48	19	28.4			63	4	6			36	31	46.3
Lauren’s classification
Intestinal-type	10	14	58.3	0.004		9	15	62.5	0.008		16	8	33.3	0.014		3	21	87.5	<0.001
Diffuse-type	61	22	26.5			56	27	32.5			73	10	12			44	39	47
TNM stage
I–II	28	24	46.2	0.005		23	29	55.8	<0.001		37	15	28.8	0.001		14	38	73.1	<0.001
III–IV	45	12	21.1			44	13	22.8			54	3	5.3			35	22	38.6
Lymph node metastasis
Positive	44	18	29	0.308		46	16	25.8	0.002		55	7	11.3	0.092		35	27	43.5	0.006
Negative	29	18	38.3			21	26	55.3			36	11	23.4			14	33	70.2
T stage
T1	11	7	38.9	0.012		7	11	61.1	<0.001		13	5	27.8	<0.001		5	13	72.2	0.002
T2	6	10	62.5			4	12	75			8	8	50			2	14	87.5
T3	6	5	45.5			7	4	36.4			9	8	18.2			4	7	63.6
T4	50	14	21.9			49	15	23.4			61	3	4.7			38	26	40.6
Vascular invasion
Positive	39	14	26.4	0.153		34	19	35.8	0.576		46	7	13.2	0.366		27	26	49.1	0.221
Negative	34	22	38.9			33	23	41.1			45	11	19.6			22	34	60.7
Perineural invasion
Positive	57	17	23	0.001		51	23	31.1	0.076		67	7	9.5	0.015		41	33	44.6	0.002
Negative	12	16	57.1			14	14	50			20	8	28.6			6	22	78.6
* double positive for ERCC6 and ERCC8 expression; ** double negative for ERCC6 and ERCC8 expression；PR positive rate
